# Supplementary material for: Chemical Constituents Identified from Fruit Body of Cordyceps bassiana and Their Anti-Inflammatory Activity
Source: PubMed Central journal article supplement — Biomol Ther (Seoul). 2016 Aug 19;25(2):165–70. doi: 10.4062/biomolther.2016.063 (PMC5340541; doi:10.4062/biomolther.2016.063), 2016-08-19

## Supplement information

### Spectroscopic data of isolated compounds

**1,9-dimethylguanine (1)**  $^1\text{H-NMR}$  (DMSO- $d_6$ , 300MHz):  $\delta$  7.64 (1H, s, H-8), 7.01 (2H, s,  $\text{NH}_2$ ), 3.53 (3H, s, N- $\text{CH}_3$ ), 3.30 (3H, s, N- $\text{CH}_3$ );  $^{13}\text{C-NMR}$  (DMSO- $d_6$ , 75 MHz) :  $\delta$  156.4 (C-2), 154.1 (C-6), 149.5 (C-4), 138.1 (C-8), 115.5 (C-5), 29.0 (N- $\text{CH}_3$ ), 27.9 (N- $\text{CH}_3$ ); UV (MeOH)  $\lambda_{\text{max}}$ , nm (log  $\epsilon$ ) : 206 (4.20), 257 (4.05); EI-MS  $m/z$  179  $[\text{M}]^+$  (100), 163  $[\text{M-NH}_2]^+$  (20); mp 286.2°C.

**Adenosine (2)**  $^1\text{H-NMR}$  (DMSO- $d_6$ , 300 MHz)  $\delta$  8.34 (1H, s, H-2), 8.13 (1H, s, H-8), 7.32 (2H, s,  $\text{NH}_2$ ), 5.88 (1H, d,  $J = 6$  Hz), 5.41 (2H, s, 2 x OH), 5.19 (1H, s, OH), 4.5 ~ 3.5 (m, ribose);  $^{13}\text{C-NMR}$  (DMSO- $d_6$ , 75 MHz)  $\delta$  156.25 (C-6), 152.50 (C-2), 149.12 (C-4), 140.06 (C-8), 119.43 (C-5), 88.01, 86.02, 73.55, 70.77, 61.77 (ribose carbons); UV (MeOH)  $\lambda_{\text{max}}$ , nm (log  $\epsilon$ ): 210 (4.29), 260 (4.18); EI-MS  $m/z$  267  $[\text{M}]^+$  (5); mp 231.0°C.

**Uridine (3)**  $^1\text{H-NMR}$  (DMSO- $d_6$ , 300 MHz)  $\delta$  11.3 (1H, s, NH), 7.89 (1H, d,  $J = 8.1$  Hz, H-6), 5.77 (1H, d, anomeric proton), 5.65 (1H, d,  $J = 8.1$  Hz, H-5), 5.43 (1H, s, OH), 5.13 (2H, s, 2 x OH);  $^{13}\text{C-NMR}$  (DMSO- $d_6$ , 75 MHz)  $\delta$  163.5 (C-4), 151.2 (C-2), 141.2 (C-6), 102.2 (C-5), 88.2, 85.3, 73.9, 70.3, 61.3 (ribose carbons); UV (MeOH)  $\lambda_{\text{max}}$ , nm (log  $\epsilon$ ): 206 (3.96), 262 (4.00); EI-MS  $m/z$  226  $[\text{M}]^+$  (20), 113  $[\text{M-ribose}]^+$  (100); mp 167.7°C.

**Nicotinamide (4)**  $^1\text{H-NMR}$  (DMSO- $d_6$ , 300 MHz)  $\delta$  9.02 (1H, d,  $J = 2.0$  Hz, H-2), 8.69 (1H, dd,  $J = 4.7, 1.5$  Hz, H-6), 8.19 (1H, ddd,  $J = 8.0, 2.0, 1.5$  Hz, H-4), 8.12 (1H, br s,  $\text{NH}_{2b}$ ), 7.54 (1H, br s,  $\text{NH}_{2a}$ ), 7.49 (1H, ddd,  $J = 8.0, 4.7, 0.9$  Hz, H-5);  $^{13}\text{C-NMR}$  (DMSO- $d_6$ , 75 MHz)  $\delta$  166.5 (C-7), 151.8 (C-2), 148.6 (C-6), 135.1 (C-4), 129.7 (C-3), 123.3 (C-5); UV (MeOH)  $\lambda_{\text{max}}$ , nm (log  $\epsilon$ ): 214 (3.91), 262 (3.43); EI-MS  $m/z$  122  $[\text{M}]^+$  (100), 106  $[\text{M-NH}_2]^+$  (80); mp 131.2°C.

**3-Methyluracil (5)**  $^1\text{H-NMR}$  (DMSO- $d_6$ , 600 MHz)  $\delta$  7.41 (1H, d,  $J = 7.8$  Hz, H-5), 5.58 (1H, d,  $J = 7.8$  Hz, H-6), 3.11 (3H, s, N- $\text{CH}_3$ );  $^{13}\text{C-NMR}$  (DMSO- $d_6$ , 150 MHz)  $\delta$  163.24 (C-4), 151.52 (C-2), 140.26 (C-5), 99.50 (C-6), 26.32 (N- $\text{CH}_3$ ); UV (MeOH)  $\lambda_{\text{max}}$ , nm (log  $\epsilon$ ) : 206 (3.77), 258 (3.71); EI-MS  $m/z$  126  $[\text{M}]^+$  (100), 69  $[\text{M-CO-NH}_3]^+$  (60).

**1,7-Dimethylxanthine (6)**  $^1\text{H-NMR}$  (DMSO- $d_6$ , 300 MHz)  $\delta$  7.62 (1H, s, H-8), 3.51 (3H, s, O- $\text{CH}_3$ ), 3.30 (3H, s, N- $\text{CH}_3$ );  $^{13}\text{C-NMR}$  (DMSO- $d_6$ , 75 MHz)  $\delta$  157.48 (C-2), 153.44 (C-6), 151.7 (C-8), 138.87 (C-4), 116.34 (C-5), 29.05 (N- $\text{CH}_3$ ), 27.82 (N- $\text{CH}_3$ ); UV (MeOH)  $\lambda_{\text{max}}$ , nm (log  $\epsilon$ ): 206 (4.23), 254 (4.13); EI-MS  $m/z$  179  $[\text{M-H}]^+$  (100), 149  $[\text{M-H-2xCH}_3]^+$  (20); mp 288.6°C.

**Nudifloric acid (7)**  $^1\text{H-NMR}$  ( $\text{DMSO-}d_6$ , 300 MHz)  $\delta$  8.44 (1H, s, H-6), 7.77 (1H, d,  $J = 9.6$  Hz, H-3), 6.39 (1H, d,  $J = 9.6$  Hz, H-4), 3.17 (3H, s, N- $\text{CH}_3$ );  $^{13}\text{C-NMR}$  ( $\text{DMSO-}d_6$ , 75 MHz)  $\delta$  165.6 (C-7), 162.25 (C-2), 144.96 (C-6), 139.09 (C-4), 118.23 (C-3), 109.56 (C-5), 48.82 (N- $\text{CH}_3$ ); HMBC (H $\rightarrow$ C) : H-6 $\rightarrow$  C-5, C-4, C-2, COOH, and N- $\text{CH}_3$ , H-4 $\rightarrow$  C-2, C-6, and COOH, H-3  $\rightarrow$  C-5, and C-2, N- $\text{CH}_3$   $\rightarrow$  C-2 and C-6; UV (MeOH)  $\lambda_{\text{max}}$ , nm (log  $\epsilon$ ): 206 (4.04), 259 (4.14); EI-MS  $m/z$  153  $[\text{M}]^+$  (100), 136  $[\text{M-OH}]^+$  (5), 108  $[\text{M-COOH}]^+$  (50) ; mp 241.5°C.

**Mannitol (8)**  $^{13}\text{C-NMR}$  ( $\text{D}_2\text{O}$ , 75 MHz)  $\delta$  73.5 (C-2 and C-5), 71.9 (C-3 and C-4), and 65.9 (C-1 and C-6).

**Supplement Fig. 1.** Schematic isolation procedure of chemical ingredients

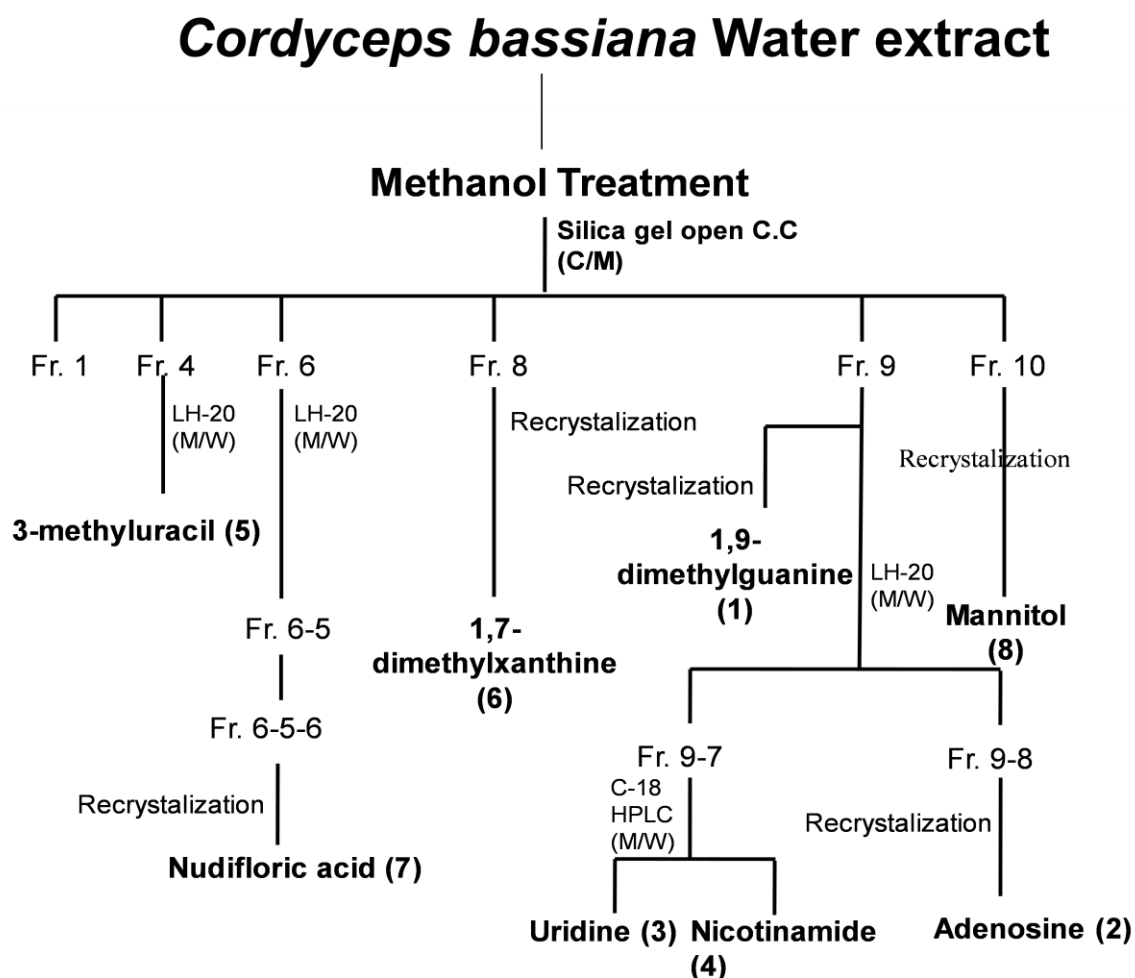

Supplement: bt-25-165_suppl.pdf [file bt-25-165_suppl.pdf]
